# Supplementary material
Source: bioRxiv or medRxiv preprint supplement (https://medrxiv.org/highwire/filestream/75737/field_highwire_adjunct_files/0/2020.03.29.20046557-1.pdf)
Supplement: Supplementary file [file 2020.03.29.20046557-1.pdf]

# 1 **Supplementary Appendix**

## 2 **eMethods**

### 3 **Cleaning regimen of rooms**

4 Routine environmental cleaning of the rooms was carried out by a trained team of  
5 housekeeping staff. High-touch surfaces (e.g. bed rail, cardiac table, switches) were cleaned  
6 twice daily using 5000 parts per million (ppm) sodium dichloroisocyanurate (NaDCC),  
7 reconstituted using Biospot<sup>®</sup> Effervescent Chlorine Tablets. The floor was cleaned daily  
8 using 1000ppm NaDCC. All surface sampling was performed in the morning before the first  
9 cleaning cycle for the day.

10 **Supplemental Figure 1: Single general ward airborne infection isolation room layout**  
11 **showing environmental sites sampled (top) and configuration of air samplers (bottom).**

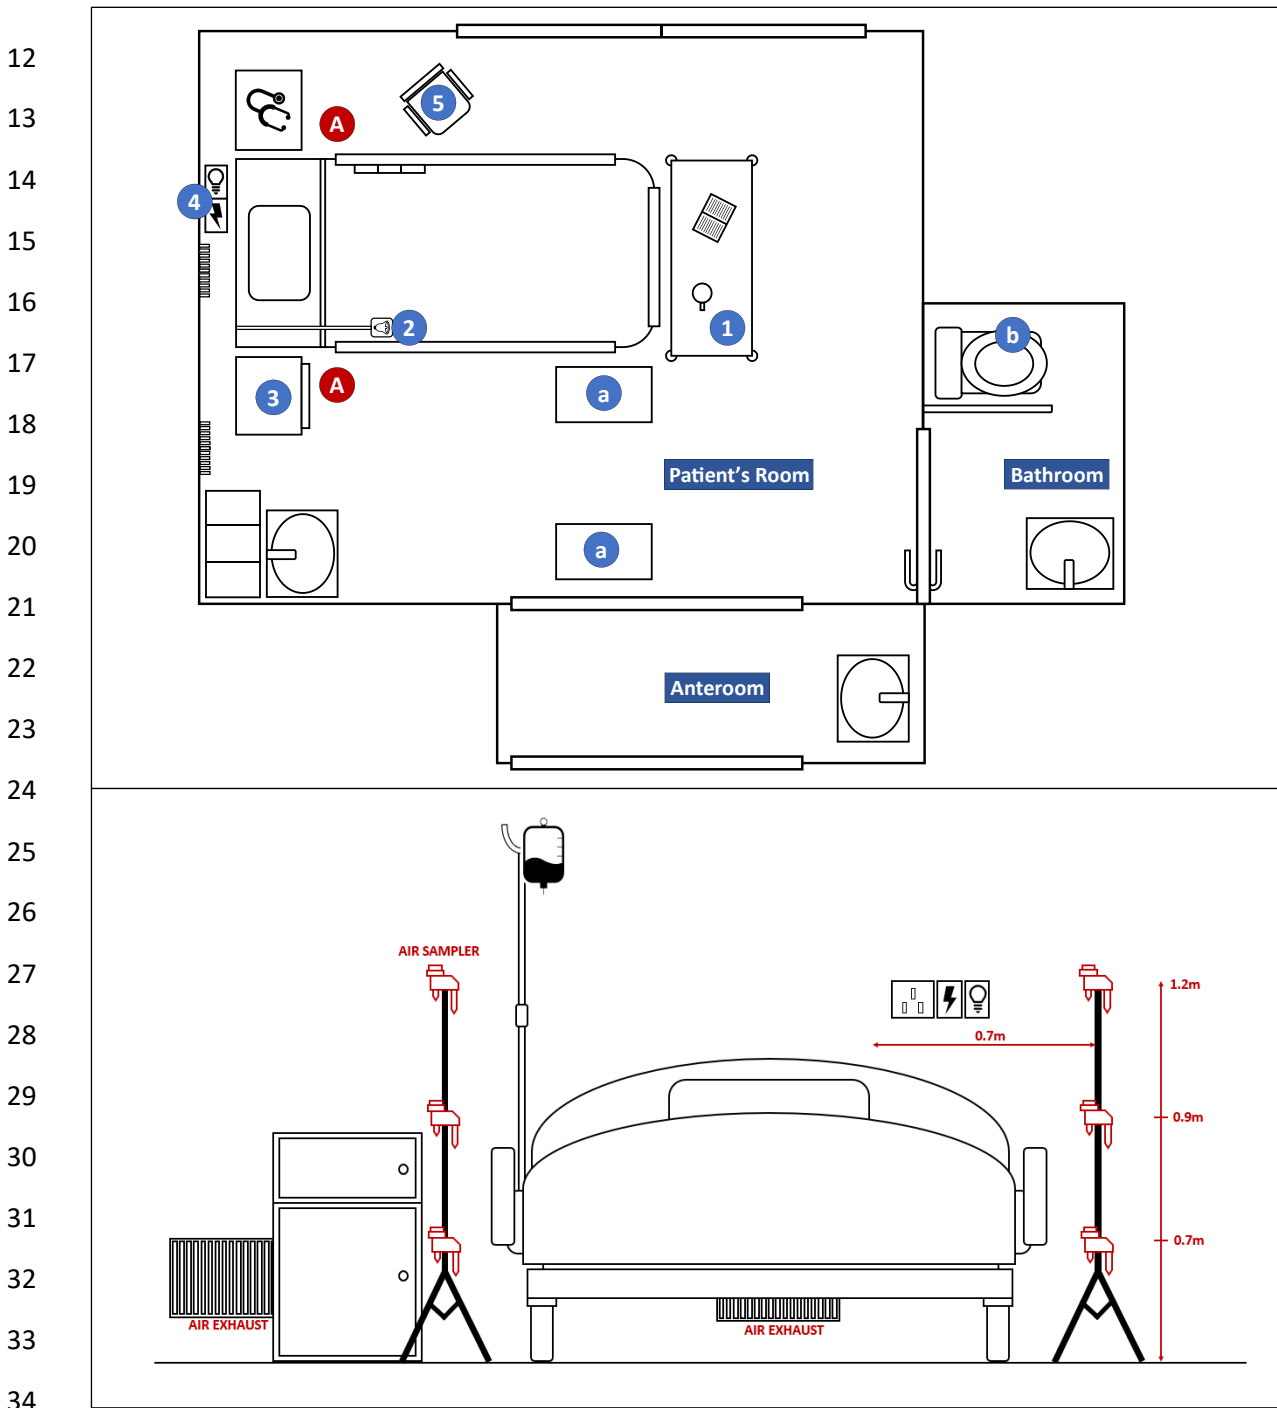

35 Top: Blue circles mark 5 high-touch areas: (1) cardiac table, (2) bed rail (including call bell),  
36 (3) locker, (4) switches, and (5) chair; as well as other key sites sampled: (a) floor, (b) toilet  
37 bowl seat. Red circles mark out positions of air samplers.

38 Bottom: Configuration of air samplers depicts air sampling layout in rooms 2 and 3 only.

39 **Supplemental Figure 2: Single intensive care unit room layout showing environmental**

40 **sites sampled**

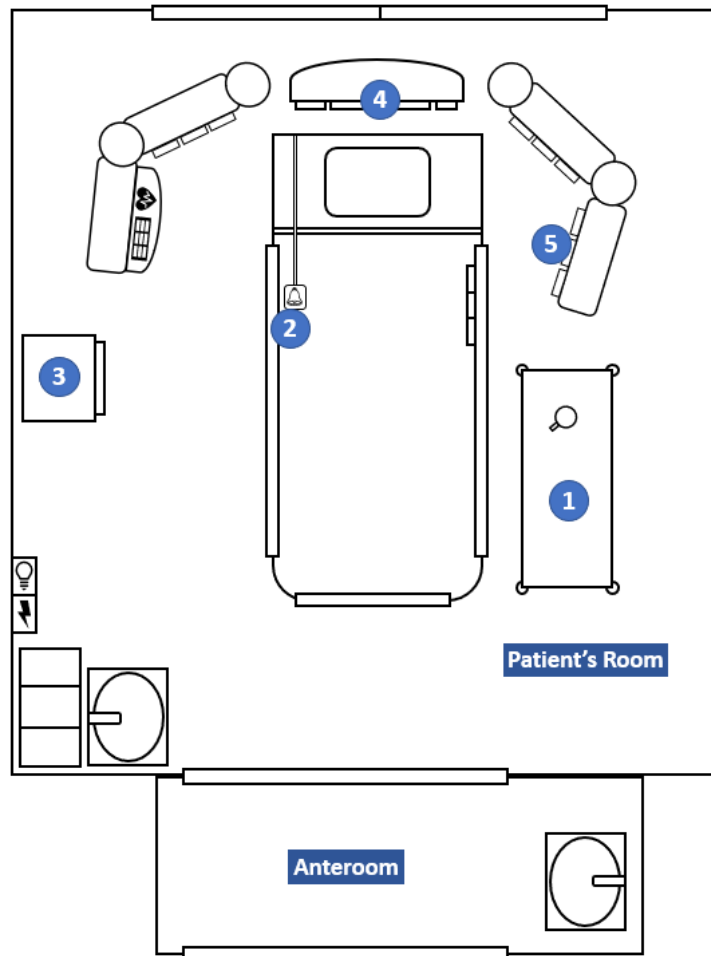

41

42 Blue circles mark 5 high-touch areas: (1) cardiac table, (2) bed rail (including call bell), (3)  
43 locker, (4) ventilator, and (5) surgical pendants.

44

45 **Supplemental Figure 3: Cycle threshold values of both clinical samples and**  
46 **environmental samples against the day of illness.**

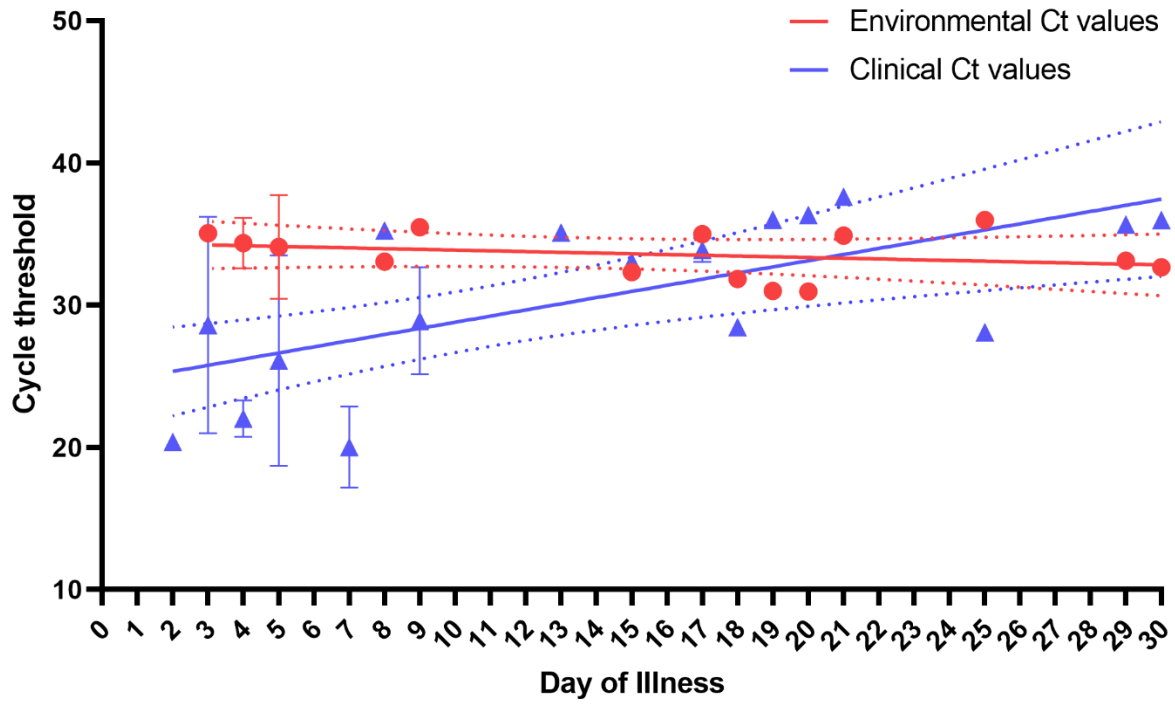

62 **Supplemental Table 1: Characteristics of each room and relevant clinical details**

| Clinical Characteristics |                             |                   |                |             |                   | Selected Surfaces |          |        |        |       |            |                |       |        | Air Sampling     |                     |                         |
|--------------------------|-----------------------------|-------------------|----------------|-------------|-------------------|-------------------|----------|--------|--------|-------|------------|----------------|-------|--------|------------------|---------------------|-------------------------|
|                          | Symptoms on day of sampling | Supp. O2 required | Day of illness | Day of stay | Clinical Ct Value | Table             | Bed Rail | Locker | Switch | Chair | Ventilator | Infusion pumps | Floor | Toilet | Air exhaust vent | Air sampling result | Particle size fractions |
| 1                        | Cough, nausea, and dyspnea  | No                | 9              | 4           | 33.22             | -                 | -        | -      | -      | -     | Na         | Na             | -     | -      | -                | -                   | Not detected            |
| 2                        | Cough and dyspnea           | No                | 5              | 3           | 18.45             | x                 | x        | x      | x      | x     | Na         | Na             | x     | x      | x                | x                   | >4 µm; 1-4 µm           |
| 3                        | Nil                         | No                | 5              | 4           | 20.11             | x                 | x        | -      | -      | x     | Na         | Na             | -     | x      | x                | x                   | >4 µm; 1-4 µm           |
| 4*                       | Nausea                      | Yes               | 29             | 20          | 35.66             | -                 | -        | -      | Na     | Na    | -          | -              | -     | Na     | Na               | Na                  | Na                      |
| 5*                       | Vomiting                    | Intubated         | 18             | 11          | 28.45             | -                 | -        | -      | Na     | Na    | -          | -              | -     | Na     | Na               | Na                  | Na                      |
| 6*                       | Dyspnea                     | Yes               | 5              | 1           | 28.69             | -                 | -        | -      | Na     | Na    | -          | -              | -     | Na     | -                | Na                  | Na                      |
| 7                        | Nil                         | No                | 30             | 14          | 35.98             | -                 | -        | -      | -      | -     | Na         | Na             | x     | -      | Na               | Na                  | Na                      |
| 8                        | Nil                         | No                | 25             | 19          | 28.09             | -                 | -        | -      | -      | -     | Na         | Na             | -     | -      | Na               | Na                  | Na                      |
| 9                        | Cough                       | No                | 21             | 16          | 37.63             | -                 | -        | -      | -      | -     | Na         | Na             | -     | -      | Na               | Na                  | Na                      |
| 10                       | Cough                       | No                | 20             | 16          | 36.34             | -                 | -        | -      | -      | -     | Na         | Na             | -     | -      | Na               | Na                  | Na                      |
| 11                       | Nil                         | No                | 17             | 15          | 34.48             | -                 | x        | -      | x      | -     | Na         | Na             | -     | -      | Na               | Na                  | Na                      |
| 12                       | Nil                         | No                | 17             | 15          | 33.28             | -                 | -        | x      | x      | -     | Na         | Na             | -     | -      | Na               | Na                  | Na                      |
| 13                       | Cough                       | No                | 19             | 14          | 36                | -                 | -        | -      | -      | -     | Na         | Na             | x     | -      | Na               | Na                  | Na                      |
| 14                       | Fever and cough             | No                | 2              | 1           | 20.37             | -                 | -        | x      | -      | -     | Na         | Na             | x     | -      | Na               | Na                  | Na                      |
| 15                       | Cough                       | Yes               | 15             | 1           | 33.04             | -                 | -        | -      | -      | -     | Na         | Na             | -     | -      | Na               | Na                  | Na                      |
| 16                       | Nil                         | No                | 13             | 8           | 35.09             | -                 | -        | -      | -      | -     | Na         | Na             | -     | -      | Na               | Na                  | Na                      |
| 17                       | Blocked nose and myalgia    | No                | 7              | 3           | 22.04             | x                 | x        | x      | x      | x     | Na         | Na             | x     | x      | Na               | Na                  | Na                      |
| 18                       | Cough                       | No                | 9              | 2           | 26.33             | -                 | -        | -      | -      | -     | Na         | Na             | -     | -      | Na               | Na                  | Na                      |
| 19                       | Fever and sore throat       | No                | 3              | 2           | 30.4              | -                 | -        | -      | -      | -     | Na         | Na             | -     | -      | Na               | Na                  | Na                      |

|    |                                          |    |   |   |       |   |   |   |   |   |    |    |   |   |    |    |    |
|----|------------------------------------------|----|---|---|-------|---|---|---|---|---|----|----|---|---|----|----|----|
| 20 | Cough                                    | No | 3 | 3 | 18.1  | x | x | x | - | x | Na | Na | x | - | Na | Na | Na |
| 21 | Cough                                    | No | 9 | 3 | 27.14 | - | x | - | - | - | Na | Na | - | - | Na | Na | Na |
| 22 | Cough                                    | No | 5 | 3 | 36.75 | x | x | - | - | - | Na | Na | - | - | Na | Na | Na |
| 23 | Fever                                    | No | 3 | 2 | 32.66 | - | - | - | - | - | Na | Na | - | - | Na | Na | Na |
| 24 | Cough                                    | No | 3 | 2 | 37.7  | - | - | - | - | - | Na | Na | x | - | Na | Na | Na |
| 25 | Myalgia                                  | No | 3 | 2 | 21.1  | - | - | - | - | - | Na | Na | - | - | Na | Na | Na |
| 26 | Fever, cough, and sore throat            | No | 4 | 3 | 22.92 | - | x | x | x | - | Na | Na | - | - | Na | Na | Na |
| 27 | Fever, cough, blocked nose, and diarrhea | No | 4 | 3 | 18.02 | x | x | x | - | - | Na | Na | x | - | Na | Na | Na |
| 28 | Fever                                    | No | 7 | 3 | 35.24 | - | - | - | - | x | Na | Na | x | x | Na | Na | Na |
| 29 | Nil                                      | No | 8 | 8 | 32.66 | - | - | - | - | - | Na | Na | x | - | Na | Na | Na |
| 30 | Cough                                    | No | 5 | 3 | 25.69 | x | x | x | x | x | Na | Na | x | x | x  | -  | Na |

63

64 x = contamination present

65 - = no contamination present

66 Na = not applicable

67

68 \* ICU rooms. All ICU patients had environmental swabs taken from the ventilator and infusion pumps instead of the electrical switches and toilet.

69 All samples from ICU were all negative.

**Supplemental Table 2: All sites sampled, and the number of rooms sampled per site**

| <b>Environmental Site</b>                        | <b>No. of rooms sampled</b> |
|--------------------------------------------------|-----------------------------|
| <b>Patient room</b>                              |                             |
| Cardiac table                                    | 30                          |
| Bed rail (including control panel and call bell) | 30                          |
| Bedside locker                                   | 30                          |
| Floor                                            | 30                          |
| Chair                                            | 27                          |
| Switches over top of beds                        | 27                          |
| Air exhaust outlet vent                          | 5                           |
| Glass window in the room                         | 5                           |
| Ventilator (ICU)                                 | 3                           |
| Infusion pumps (ICU)                             | 3                           |
| Surgical pendants (ICU)                          | 3                           |
| Vital sign display screen (ICU)                  | 3                           |
| Stethoscope                                      | 3                           |
| Sink, external surface                           | 3                           |
| Sink, internal bowl                              | 3                           |
| Interior of room glass door                      | 3                           |
| PPE storage area over sink                       | 2                           |
| <b>Toilet</b>                                    |                             |
| Toilet seat & automatic flush button             | 27                          |
| Door handle                                      | 2                           |
| Hand rail                                        | 2                           |
| Sink, external surface                           | 2                           |
| Sink, internal bowl                              | 2                           |

**Supplemental Table 3: Other co-authors in the team authorship**

| Name                   | Academic Qualifications | Affiliations                                                                                                                                                                                                                                   |
|------------------------|-------------------------|------------------------------------------------------------------------------------------------------------------------------------------------------------------------------------------------------------------------------------------------|
| David Chien Lye        | MBBS                    | National Centre for Infectious Diseases, Singapore<br>Tan Tock Seng Hospital, Singapore<br>Lee Kong Chian School of Medicine, Nanyang Technological University, Singapore<br>Yong Loo Lin School of Medicine, National University of Singapore |
| Poh Lian Lim           | MD                      | National Centre for Infectious Diseases, Singapore<br>Tan Tock Seng Hospital, Singapore<br>Lee Kong Chian School of Medicine, Nanyang Technological University, Singapore<br>Yong Loo Lin School of Medicine, National University of Singapore |
| Cheng Chuan Lee        | MBBS                    | National Centre for Infectious Diseases, Singapore<br>Tan Tock Seng Hospital, Singapore                                                                                                                                                        |
| Li Min Ling            | MBBS                    | National Centre for Infectious Diseases, Singapore<br>Tan Tock Seng Hospital, Singapore                                                                                                                                                        |
| Lawrence Lee           | MBBS                    | National Centre for Infectious Diseases, Singapore<br>Tan Tock Seng Hospital, Singapore                                                                                                                                                        |
| Tau Hong Lee           | MBBS                    | National Centre for Infectious Diseases, Singapore<br>Tan Tock Seng Hospital, Singapore                                                                                                                                                        |
| Chen Seong Wong        | MBBS                    | National Centre for Infectious Diseases, Singapore<br>Tan Tock Seng Hospital, Singapore                                                                                                                                                        |
| Sapna Sadarangani      | MBBS                    | National Centre for Infectious Diseases, Singapore<br>Tan Tock Seng Hospital, Singapore                                                                                                                                                        |
| Ray Lin                | MBBS                    | National Centre for Infectious Diseases, Singapore<br>Tan Tock Seng Hospital, Singapore                                                                                                                                                        |
| Deborah Hee Ling Ng    | MChB, MPH               | National Centre for Infectious Diseases, Singapore<br>Tan Tock Seng Hospital, Singapore                                                                                                                                                        |
| Mucheli Sadasiv        | MBBS                    | National Centre for Infectious Diseases, Singapore<br>Tan Tock Seng Hospital, Singapore                                                                                                                                                        |
| Chiaw Yee Choy         | MBBS                    | National Centre for Infectious Diseases, Singapore<br>Tan Tock Seng Hospital, Singapore                                                                                                                                                        |
| Glorijoy Shi En Tan    | MBBS                    | National Centre for Infectious Diseases, Singapore<br>Tan Tock Seng Hospital, Singapore                                                                                                                                                        |
| Frederico Dimatatac    | MD                      | National Centre for Infectious Diseases, Singapore<br>Tan Tock Seng Hospital, Singapore                                                                                                                                                        |
| Isais Florante Santos  | MD                      | National Centre for Infectious Diseases, Singapore<br>Tan Tock Seng Hospital, Singapore                                                                                                                                                        |
| Chi Jong Go            | MD                      | National Centre for Infectious Diseases, Singapore<br>Tan Tock Seng Hospital, Singapore                                                                                                                                                        |
| Yu Kit Chan            | MBBS                    | National Centre for Infectious Diseases, Singapore<br>Tan Tock Seng Hospital, Singapore                                                                                                                                                        |
| Jun Yang Tay           | MBBS                    | National Centre for Infectious Diseases, Singapore<br>Tan Tock Seng Hospital, Singapore                                                                                                                                                        |
| Jackie Yu-Ling Tan     | MBBS                    | Tan Tock Seng Hospital, Singapore                                                                                                                                                                                                              |
| Nihar Pandit           | MBBS                    | Tan Tock Seng Hospital, Singapore                                                                                                                                                                                                              |
| Benjamin Choon Heng Ho | MBBS                    | Tan Tock Seng Hospital, Singapore                                                                                                                                                                                                              |
| Xiao Fang Lim          | BSc                     | DSO National Laboratories, Singapore                                                                                                                                                                                                           |
| Ai Sim Lim             | BSc                     | DSO National Laboratories, Singapore                                                                                                                                                                                                           |
| Shehara Mendis         | MBBS                    | Tan Tock Seng Hospital, Singapore                                                                                                                                                                                                              |



|                           |     |                                                                                                              |
|---------------------------|-----|--------------------------------------------------------------------------------------------------------------|
| Yuan Yi Constance<br>Chen | MD  | Tan Tock Seng Hospital, Singapore                                                                            |
| Mohammad Yazid<br>Abdad   | PhD | National Centre for Infectious Diseases, Singapore                                                           |
| Daniela Moses             | PhD | Singapore Centre for Environmental Life Sciences Engineering,<br>Nanyang Technological University, Singapore |

103

104
